# Supplementary material
Source: Springer Nature journal article supplement (https://www.springermedizin.de/resource/supplementary/13069_2011_107_MOESM2_ESM.pdf/9659770)

**A** $\alpha$ -SMA

Control

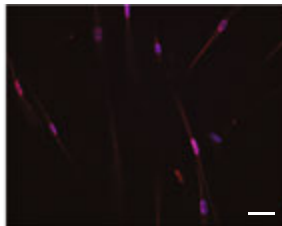TGF- $\beta$ 1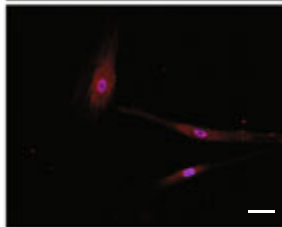**C**

prolyl 4-hydroxylase

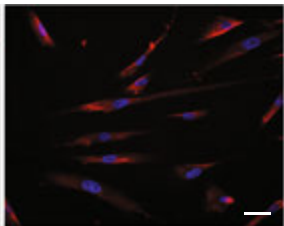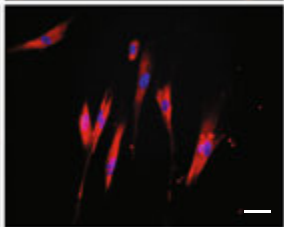**B**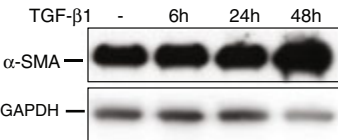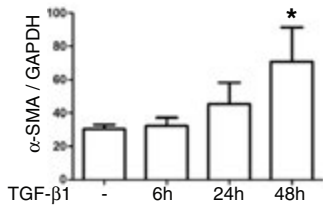**D**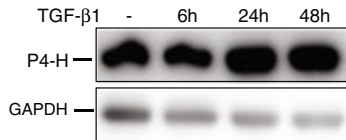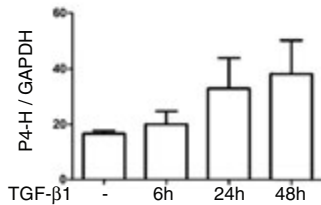

Supplement: MOESM2 [file 9659770]
